# Supplementary material for: In situ SERS detection of emulsifiers at lipid interfaces using label-free amphiphilic gold nanoparticles
Source: Royal Society of Chemistry journal article supplement (doi:10.1039/c4an00869c), 2014-01-01
Supplement: c4an00869c1.pdf [file c4an00869c1.pdf]

## Supporting Information

### **In situ SERS Characterization of Emulsifiers at Lipid Interfaces using Label-free Amphiphilic Gold Nanoparticles**

Yue Li,<sup>†,‡</sup> Michael Driver,<sup>†</sup> Thunnalin Winuprasith,<sup>†</sup> Jinkai Zheng,<sup>†,§</sup> David Julian  
McClements<sup>†</sup> and Lili He<sup>\*,†</sup>

Particle size distributions of gold nanoparticles (GNPs) made from sodium citrate and HAuCl<sub>4</sub> were carried out using a dynamic light scattering device (Nano-ZS, Malvern Instruments, Worcestershire, UK) (**Figure S1**). The mean particle diameter (Z-average) calculated from the particle size distribution was 24 nm.

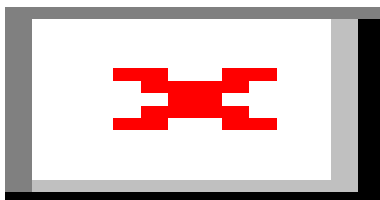

**Figure S1.** Particle size distributions of GNPs made from sodium citrate and HAuCl<sub>4</sub>.

Visual observations by transmission electron microscope (TEM) of the modified amphiphilic GNPs showed no obvious differences to those of unmodified hydrophilic GNPs (**Figure S2**).

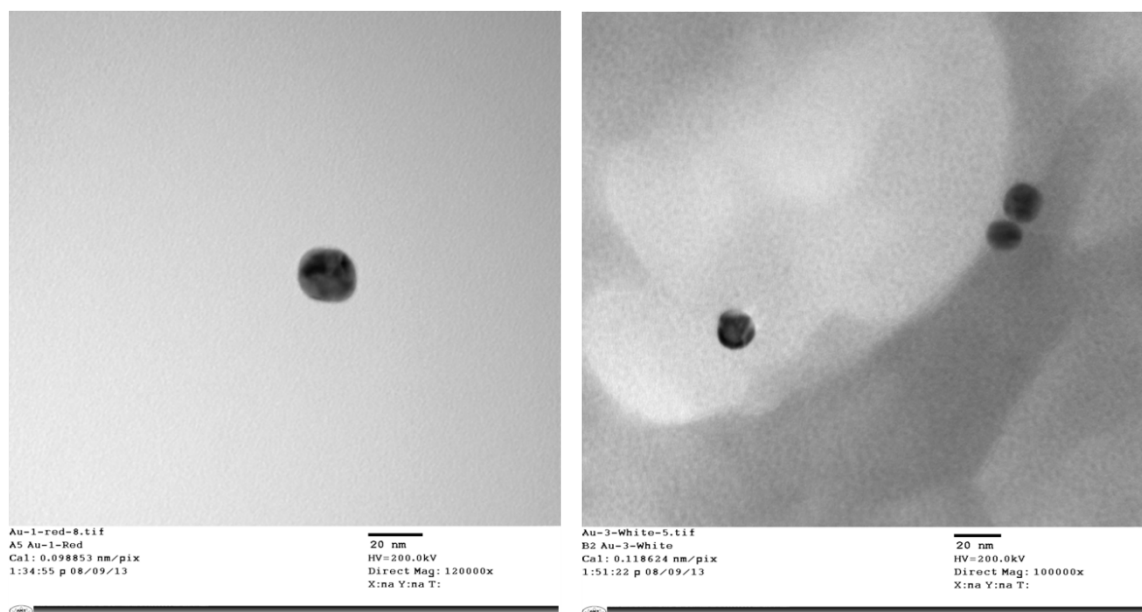

(a)

(b)

**Figure S2.** TEM of (a) modified and (b) unmodified GNPs.

Under dark-field microscope, the unmodified GNPs in aqueous phase reflected green light, due to the surface plasmon resonance (SPR) peak at around 550 nm (green) (**Figure S3a**). After 12 hrs incubation with octanethiol, a significant increase in the amount of GNPs was observed in the interfacial layer, and the color shifted to blue, indicating conjugation with ligand molecules (**Figure S3b**).

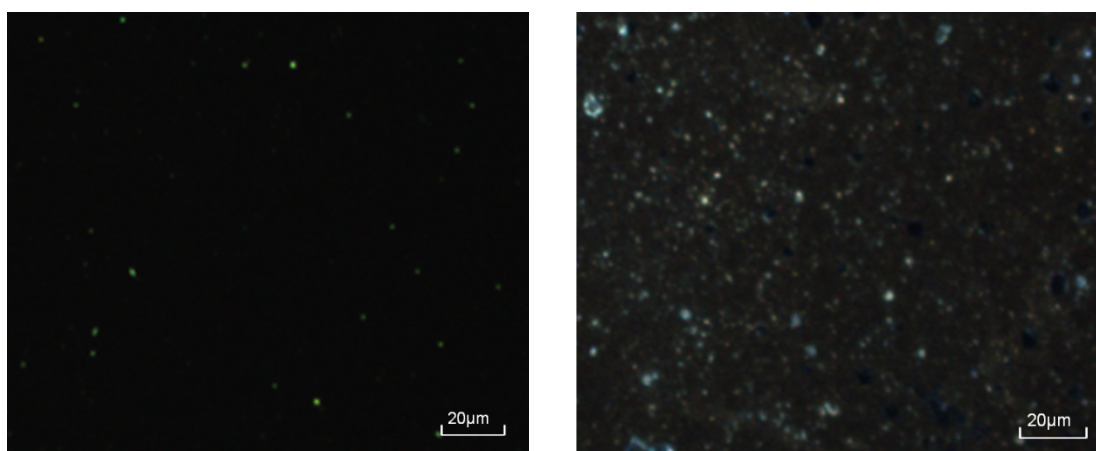

(a)

(b)

**Figure S3.** Dark-field light-scattering images of modified and unmodified GNPs. (a) Unmodified

GNPs in aqueous phase. (b) Modified GNPs at Hexane/Aqueous Interfacial layer.

The spectra of the GNPs before and after modification were the average of 10 spectra collected. The statistical analysis (principal component analysis) was plotted in the **figure S4**. In the PCA plot, we can clearly see these two sample data points were distinctly separated, indicating their SERS patterns were statistically different.

Figure S4. A PCA plot of the SERS spectra of GNPs before (+) and after (o) modification.

The water-in-oil emulsions containing amphiphilic or hydrophilic GNPs had different optical properties when observed by dark field light scattering microscopy (**Figure S5**). Few bright circles were observed around the water droplets in the emulsion made with amphiphilic GNPs (**Figure S5a**). On the other hand, bright circles were observed at the edge of the water droplets in the samples containing hydrophilic GNPs (**Figure S5b**) or no GNPs (**Figure S5c**). The fact that light scattering from the water droplets was only altered in the presence of amphiphilic GNPs, suggests that they were adsorbed to the droplet surfaces.

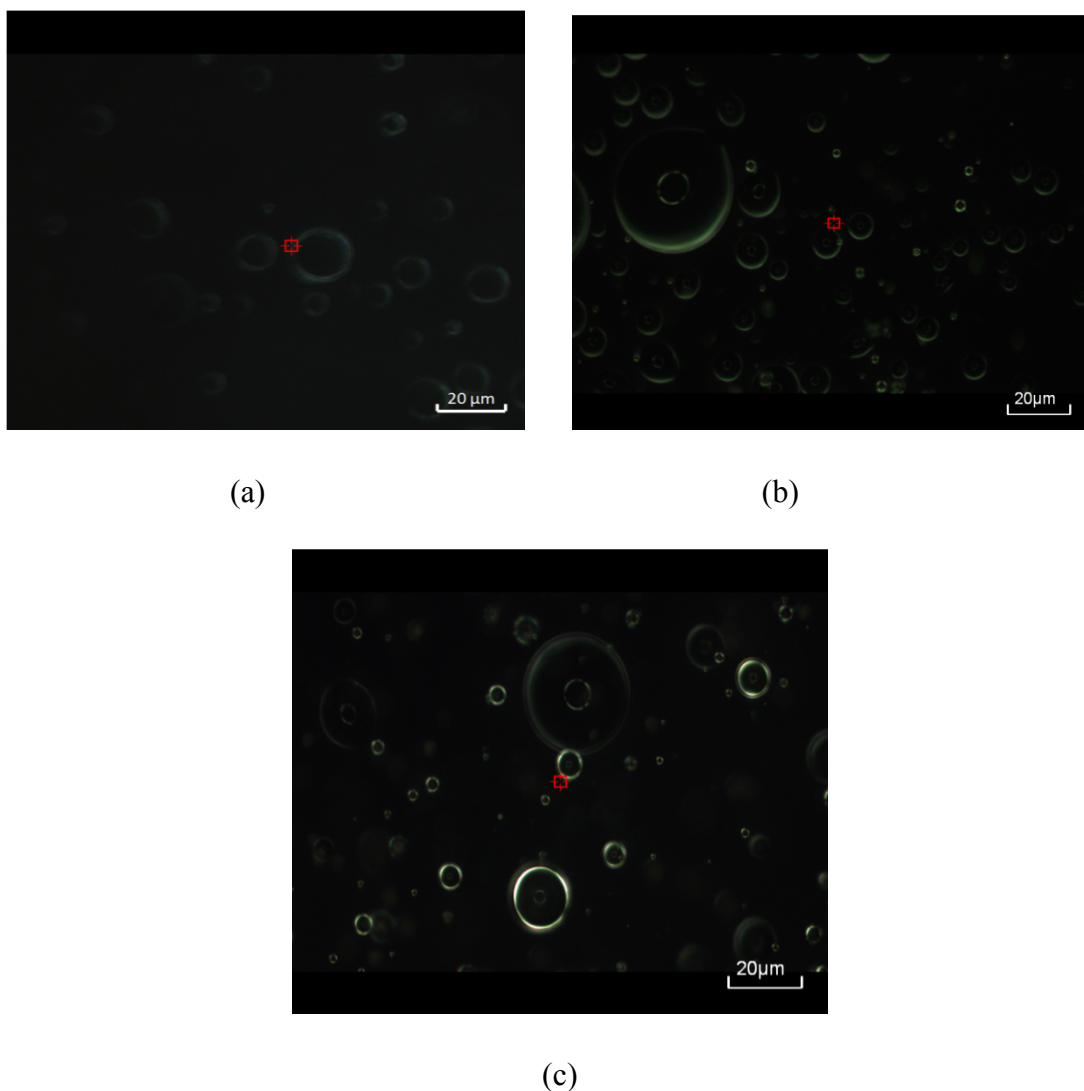

**Figure S5.** Dark field image of (a) W/O emulsion with modified GNPs, (b) W/O emulsion with unmodified GNPs, and (c) W/O emulsion without GNPs.

No emulsifier signal (neither Tween 20 nor  $\beta$ -lactoglobulin) was observed at the interfacial layer for emulsions without modified GNPs (**Figures S6a and S6b**). Instead, only oil signals were detected. The weak signal from the emulsifier at the interface was obscured by the strong signal from the canola oil because the thin interfacial layer ( $< 10$  nm) only makes up a very small part of the laser detection area (3000 nm).

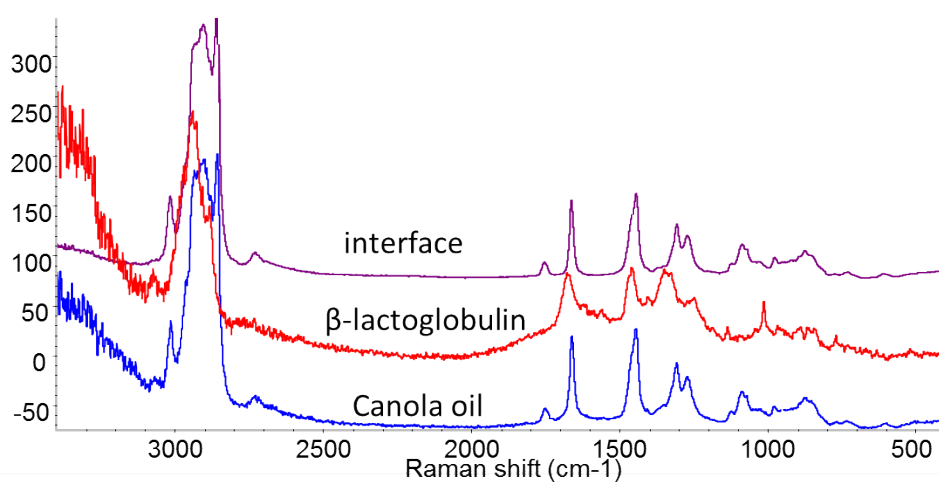

(a)

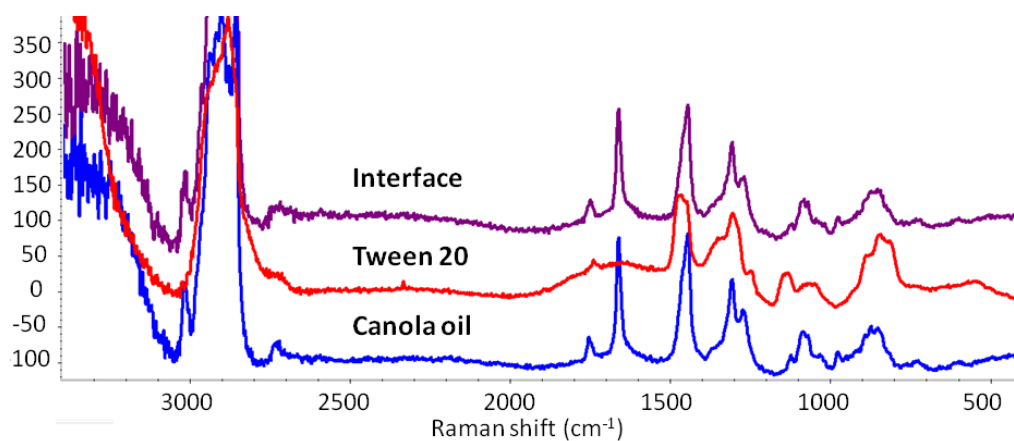

(b)

**Figure S6.** (a) Raman spectra of Tween 20, Canola oil and the interface of the emulsion (without modified GNPs) made from Tween 20. (b) Raman spectra of  $\beta$ -lactoglobulin, Canola oil, and the interface of the emulsion (without modified GNPs) made from  $\beta$ -lactoglobulin.
